# Supplementary material for: Sphingomyelin and progression of renal and coronary heart disease in individuals with type 1 diabetes
Source: PubMed Central journal article supplement (PMC7406485; doi:10.1007/s00125-020-05201-9), 2020-06-20
Supplement: 125_2020_5201_MOESM1_ESM.pdf [file 125_2020_5201_MOESM1_ESM.pdf]

## Electronic Supplementary Material (SEM)

ESM Table 1. Bivariate associations between sphingomyelin and baseline variables.

| Variable                | Pearson's correlation coefficient | <i>p</i> value |
|-------------------------|-----------------------------------|----------------|
| Age                     | 0.12                              | <0.001         |
| Diabetes duration       | 0.12                              | <0.001         |
| Age at diabetes onset   | -0.02                             | 0.5            |
| BMI                     | 0.07                              | 0.02           |
| Height                  | -0.14                             | <0.001         |
| Waist-to-hip ratio      | -0.04                             | 0.15           |
| Systolic blood pressure | 0.10                              | 0.001          |
| HbA <sub>1c</sub>       | 0.18                              | <0.001         |
| Total cholesterol       | 0.58                              | <0.001         |
| HDL-cholesterol         | 0.10                              | 0.002          |
| Serum triacylglycerols  | 0.22                              | <0.001         |
| eGFR                    | -0.11                             | 0.001          |
| UAER                    | 0.21                              | <0.001         |

ESM Table 2. Baseline data of the cohort studied according to the highest and lowest quartile of sphingomyelin concentration.

| Characteristic                         | highest sphingomyelin quartile | lowest sphingomyelin quartile |
|----------------------------------------|--------------------------------|-------------------------------|
| <i>N</i>                               | 272                            | 271                           |
| Sex (M/F, %)                           | 47/53                          | 62/38*                        |
| Age at diabetes onset (years)          | 14.1 (9.0, 21.3)               | 14.1 (9.2, 22.6)              |
| Diabetes duration (years)              | 24.2 (15.7, 32.6)              | 18.7 (9.2, 30.9)*             |
| Current/ex/never smokers (%)           | 33/25/42                       | 24/21/55*                     |
| BMI (kg/m <sup>2</sup> )               | 25.0 (22.7, 27.8)              | 24.1 (22.5, 26.4)*            |
| Waist-to-hip ratio                     | 0.86 ± 0.08                    | 0.87 ± 0.07                   |
| Systolic blood pressure (mmHg)         | 134 (122, 146)                 | 132 (121, 140)*               |
| Diastolic blood pressure (mmHg)        | 80 (72, 86)                    | 78 (71, 83)*                  |
| Insulin dose (IU/kg)                   | 0.67 (0.54, 0.83)              | 0.67 (0.50, 0.83)             |
| HbA <sub>1c</sub> (mmol/mol)           | 72.7 (60.7, 83.9)              | 65.0 (55.2, 74.9)*            |
| HbA <sub>1c</sub> (%)                  | 8.8 (7.7, 9.8)                 | 8.1 (7.2, 9.0)*               |
| eGFR (ml/min/1.73m <sup>2</sup> )      | 98 (75, 112)                   | 109 (96, 120)*                |
| Normoalbuminuria (%)                   | 56                             | 80*                           |
| Microalbuminuria (%)                   | 16                             | 13*                           |
| Macroalbuminuria (%)                   | 28                             | 7*                            |
| Lipid lowering medication (%)          | 12                             | 14                            |
| Blood pressure lowering medication (%) | 47                             | 31*                           |
| Retinal laser treatment (%)            | 37                             | 23*                           |
| Serum cholesterol (mmol/l)             | 5.6 (5.0, 6.1)                 | 4.2 (3.8, 4.7)*               |
| HDL-cholesterol (mmol/l)               | 1.4 (1.1, 1.7)                 | 1.3 (1.1, 1.5)*               |

|                           |                   |                   |
|---------------------------|-------------------|-------------------|
| Triacylglycerols (mmol/l) | 1.2 (0.9, 1.8)    | 0.9 (0.7, 1.3)*   |
| Serum sphingomyelin (CU)# | 0.58 (0.54, 0.63) | 0.37 (0.34, 0.39) |

#NMR measures are provided in CU that are based on the trimethylsilyl propanoic acid reference signal. Data are presented as mean  $\pm$  standard deviation or as median (25<sup>th</sup>, 75<sup>th</sup> percentile), as appropriate. \* stands for *p* value <0.05 for variables with significant difference between the 2 groups of sphingomyelin (SM) level.

ESM Table 3. A. Multivariable linear regression model for annual percentage change in eGFR (ml/min/1.73 m<sup>2</sup>/year). Adjusted R<sup>2</sup> of the model 0.183; *p* value <0.001.

| Variable                                               | B coefficient | 95% CI         | β      | <i>p</i> value |
|--------------------------------------------------------|---------------|----------------|--------|----------------|
| Serum sphingomyelin (1SD increase in CU <sup>#</sup> ) | -0.012        | -0.016; -0.008 | -0.172 | <0.001         |
| Sex (male=1)                                           | -0.002        | -0.011; 0.007  | -0.014 | 0.66           |
| Diabetes duration (years)                              | 0.000         | -0.001; 0.000  | -0.058 | 0.11           |
| Age at diabetes onset (years)                          | 0.000         | 0.000; 0.001   | 0.047  | 0.16           |
| Smoking (current vs. never)                            | -0.001        | -0.010; 0.009  | -0.005 | 0.88           |
| Smoking (ex vs. never)                                 | -0.005        | -0.016; 0.005  | -0.029 | 0.32           |
| Systolic blood pressure (mmHg)                         | -0.001        | -0.001; 0.000  | -0.184 | <0.001         |
| HbA <sub>1c</sub> (mmol/mol)                           | -0.001        | -0.001; 0.000  | -0.130 | <0.001         |
| BMI (kg/m <sup>2</sup> )                               | 0.003         | 0.001; 0.004   | 0.134  | <0.001         |
| HDL-cholesterol (mmol/L)                               | 0.032         | 0.021; 0.044   | 0.181  | <0.001         |
| Triacylglycerols (mmol/L)                              | -0.012        | -0.017; -0.006 | -0.137 | <0.001         |
| Constant                                               | 0.017         | -0.034; 0.069  |        | 0.51           |

#NMR measures are provided in CU that are based on the trimethylsilyl propanoic acid reference signal.

B coefficient - the unstandardised regression coefficient, β - a standardised regression coefficient.

B. Multivariable linear regression model for annual percentage change in eGFR (ml/min/1.73 m<sup>2</sup>/year), adjusted for the baseline eGFR. Adjusted R<sup>2</sup> of the model 0.329; *p* value <0.001.

| Variable                                               | B coefficient | 95% CI         | β      | <i>p</i> value |
|--------------------------------------------------------|---------------|----------------|--------|----------------|
| Serum sphingomyelin (1SD increase in CU <sup>#</sup> ) | -0.008        | -0.012; -0.004 | -0.116 | <0.001         |
| baseline eGFR (ml/min/1.73m <sup>2</sup> )             | 0.001         | 0.001; 0.001   | 0.479  | <0.001         |
| Sex (male=1)                                           | -0.012        | -0.020; -0.004 | -0.089 | 0.002          |
| Diabetes duration (years)                              | 0.001         | 0.001; 0.001   | 0.195  | <0.001         |
| Age at diabetes onset (years)                          | 0.001         | 0.001; 0.002   | 0.155  | <0.001         |
| Smoking (current vs. never)                            | -0.003        | -0.012; 0.005  | -0.020 | 0.46           |
| Smoking (ex vs. never)                                 | 0.002         | -0.008; 0.011  | 0.009  | 0.74           |
| Systolic blood pressure (mmHg)                         | 0.000         | -0.001; 0.000  | -0.116 | <0.001         |
| HbA <sub>1c</sub> (mmol/mol)                           | -0.001        | -0.001; 0.000  | -0.149 | <0.001         |
| BMI (kg/m <sup>2</sup> )                               | 0.002         | 0.001; 0.004   | 0.127  | <0.001         |
| HDL-cholesterol (mmol/L)                               | 0.024         | 0.013; 0.034   | 0.134  | <0.001         |
| Triacylglycerols (mmol/L)                              | -0.008        | -0.013; -0.003 | -0.091 | 0.002          |
| Constant                                               | -0.167        | -0.219; -0.114 |        | <0.001         |

#NMR measures are provided in CU that are based on the trimethylsilyl propanoic acid reference signal.  
 B coefficient - the unstandardised regression coefficient,  $\beta$  - a standardised regression coefficient.

C. Binary logistic regression models for variables associated with the 25% fastest eGFR decline (vs. all others) according to the baseline eGFR below or above 60 or 90 ml/min/1.73m<sup>2</sup>.

| Variable                                               | eGFR $\geq$ 90 ml/min/m <sup>2</sup> |                | 60 < eGFR $\leq$ 90 ml/min/m <sup>2</sup> |                | eGFR <60 ml/min/m <sup>2</sup> |                |
|--------------------------------------------------------|--------------------------------------|----------------|-------------------------------------------|----------------|--------------------------------|----------------|
|                                                        | n=142/794                            |                | n=42/196                                  |                | n=59/97                        |                |
|                                                        | OR (95% CI)                          | <i>p</i> value | OR (95% CI)                               | <i>p</i> value | OR (95% CI)                    | <i>p</i> value |
| Serum sphingomyelin (1SD increase in CU <sup>#</sup> ) | 1.32 (1.05-1.65)                     | 0.019          | 0.93 (0.63-1.38)                          | 0.71           | 1.84 (1.01-3.37)               | 0.047          |
| Sex (male=1)                                           | 1.88 (1.19-2.99)                     | 0.007          | 1.16 (0.51-2.62)                          | 0.73           | 0.80 (0.22-2.90)               | 0.73           |
| Diabetes duration (years)                              | 1.01 (0.99-1.03)                     | 0.42           | 1.03 (0.99-1.08)                          | 0.13           | 0.98 (0.92-1.05)               | 0.60           |
| Age at diabetes onset (years)                          | 0.98 (0.95-1.01)                     | 0.18           | 1.02 (0.97-1.07)                          | 0.44           | 0.98 (0.89-1.07)               | 0.58           |
| Smoking (current vs.never)                             | 1.08 (0.68-1.69)                     | 0.75           | 1.06 (0.38-2.99)                          | 0.91           | 2.15 (0.34-13.83)              | 0.42           |
| Smoking (ex vs. never)                                 | 1.02 (0.59-1.78)                     | 0.94           | 1.00 (0.40-2.50)                          | 0.99           | 1.18 (0.34-4.12)               | 0.79           |
| Systolic blood pressure (mmHg)                         | 1.00 (0.99-1.02)                     | 0.95           | 1.01 (0.99-1.03)                          | 0.45           | 1.01 (0.98-1.03)               | 0.58           |
| HbA1c (mmol/mol)                                       | 1.02 (1.01-1.03)                     | 0.03           | 1.03 (1.00-1.06)                          | 0.05           | 1.04 (1.00-1.08)               | 0.09           |
| BMI (kg/m <sup>2</sup> )                               | 0.91 (0.85-0.97)                     | 0.003          | 0.92 (0.82-1.04)                          | 0.18           | 0.98 (0.84-1.14)               | 0.80           |
| HDL-cholesterol (mmol/L)                               | 0.39 (0.21-0.74)                     | 0.004          | 0.43 (0.15-1.26)                          | 0.12           | 0.24 (0.04-1.37)               | 0.11           |
| Triacylglycerols (mmol/L)                              | 1.35 (1.05-1.73)                     | 0.018          | 1.45 (0.81-2.60)                          | 0.21           | 0.61 (0.30-1.21)               | 0.16           |

#NMR measures are provided in CU that are based on the trimethylsilyl propanoic acid reference signal.  
 B coefficient - the unstandardised regression coefficient,  $\beta$  - a standardised regression coefficient.

|                                       | eGFR halving     |                | eGFR<15 ml/min/1.73m <sup>2</sup> |                | eGFR halving and eGFR<15 ml/min/1.73m <sup>2</sup> |                | eGFR decrease of >20 ml/min/1.73m <sup>2</sup> |                | eGFR halving or decrease of >20 ml/min/1.73m <sup>2</sup> |                | eGFR decrease of >25% and change of CKD stage |                |
|---------------------------------------|------------------|----------------|-----------------------------------|----------------|----------------------------------------------------|----------------|------------------------------------------------|----------------|-----------------------------------------------------------|----------------|-----------------------------------------------|----------------|
|                                       | n=100            |                | n=87                              |                | n=73                                               |                | n=222                                          |                | n=234                                                     |                | n=176                                         |                |
| Variable                              | OR (95% CI)      | <i>p</i> value | OR (95% CI)                       | <i>p</i> value | OR (95% CI)                                        | <i>p</i> value | OR (95% CI)                                    | <i>p</i> value | OR (95% CI)                                               | <i>p</i> value | OR (95% CI)                                   | <i>p</i> value |
| Serum sphingomyelin (1SD incr. in CU) | 1.53 (1.20-1.96) | 0.001          | 1.85 (1.41-2.43)                  | <0.001         | 1.67 (1.26-2.20)                                   | <0.001         | 1.28 (1.08-1.52)                               | 0.005          | 1.33 (1.12-1.58)                                          | 0.001          | 1.37 (1.13-1.67)                              | 0.002          |
| Sex (male=1)                          | 1.17 (0.69-1.98) | 0.56           | 0.77 (0.43-1.36)                  | 0.37           | 0.83 (0.45-1.51)                                   | 0.54           | 1.32 (0.93-1.89)                               | 0.12           | 1.23 (0.87-1.75)                                          | 0.24           | 0.93 (0.62-1.40)                              | 0.72           |
| Diabetes duration (years)             | 1.05 (1.02-1.07) | <0.001         | 1.03 (1.00-1.06)                  | 0.028          | 1.03 (1.00-1.06)                                   | 0.027          | 1.01 (0.99-1.02)                               | 0.31           | 1.01 (1.00-1.03)                                          | 0.15           | 1.05 (1.03-1.07)                              | <0.001         |
| Age at diabetes onset (years)         | 0.98 (0.95-1.01) | 0.16           | 0.98 (0.94-1.01)                  | 0.229          | 0.98 (0.95-1.02)                                   | 0.32           | 0.98 (0.96-1.01)                               | 0.13           | 0.98 (0.96-1.00)                                          | 0.10           | 1.00 (0.98-1.03)                              | 0.74           |
| Smoking (curr. vs.never)              | 1.18 (0.68-2.07) | 0.55           | 0.99 (0.53-1.84)                  | 0.96           | 0.91 (0.47-1.75)                                   | 0.77           | 1.12 (0.77-1.64)                               | 0.54           | 1.05 (0.72-1.54)                                          | 0.78           | 1.08 (0.69-1.69)                              | 0.75           |
| Smoking (ex vs. never)                | 1.25 (0.69-2.26) | 0.46           | 1.41 (0.74-2.66)                  | 0.29           | 1.40 (0.72-2.71)                                   | 0.32           | 1.00 (0.66-1.53)                               | 0.98           | 1.10 (0.73-1.65)                                          | 0.66           | 1.37 (0.87-2.18)                              | 0.18           |
| Systolic blood pressure (mmHg)        | 1.02 (1.00-1.03) | 0.034          | 1.03 (1.02-1.05)                  | <0.001         | 1.02 (1.01-1.04)                                   | 0.003          | 1.00 (0.99-1.01)                               | 0.69           | 1.00 (0.99-1.01)                                          | 0.59           | 1.01 (1.00-1.02)                              | 0.043          |
| HbA <sub>1c</sub> (mmol/mol)          | 1.04 (1.03-1.06) | <0.001         | 1.03 (1.01-1.05)                  | <0.001         | 1.04 (1.02-1.06)                                   | <0.001         | 1.02 (1.01-1.03)                               | <0.001         | 1.02 (1.01-1.03)                                          | <0.001         | 1.04 (1.03-1.05)                              | <0.001         |
| BMI (kg/m <sup>2</sup> )              | 0.93             | 0.028          | 0.89                              | 0.002          | 0.92                                               | 0.039          | 0.97                                           | 0.23           | 0.96                                                      | 0.10           | 0.93                                          | 0.015          |

|                           |                     |       |                     |        |                     |       |                     |       |                     |        |                     |        |
|---------------------------|---------------------|-------|---------------------|--------|---------------------|-------|---------------------|-------|---------------------|--------|---------------------|--------|
|                           | (0.86-0.99)         |       | (0.82-0.96)         |        | (0.85-1.00)         |       | (0.93-1.02)         |       | (0.92-1.01)         |        | (0.89-0.99)         |        |
| HDL-cholesterol (mmol/L)  | 0.33<br>(0.16-0.66) | 0.002 | 0.19<br>(0.08-0.42) | <0.001 | 0.29<br>(0.13-0.65) | 0.003 | 0.44<br>(0.27-0.72) | 0.001 | 0.37<br>(0.23-0.61) | <0.001 | 0.30<br>(0.17-0.53) | <0.001 |
| Triacylglycerols (mmol/L) | 1.54<br>(1.20-1.97) | 0.001 | 1.58<br>(1.20-2.07) | 0.001  | 1.55<br>(1.19-2.03) | 0.001 | 1.29<br>(1.06-1.56) | 0.010 | 1.32<br>(1.08-1.61) | 0.006  | 1.58<br>(1.26-1.97) | <0.001 |

ESM Table 4. Binary logistic regression models showing the association of serum sphingomyelin with eGFR decrease, defined in different ways

ESM Table 5. Cox regression models presenting the HRs for serum sphingomyelin as a risk factor for albuminuria progression.

| Model                                                                        | Progression to microalbuminuria<br>( <i>n</i> = 134/778) |                | Progression to macroalbuminuria<br>( <i>n</i> = 46/148) |                |
|------------------------------------------------------------------------------|----------------------------------------------------------|----------------|---------------------------------------------------------|----------------|
|                                                                              | HR* (95% CI)                                             | <i>p</i> value | HR* (95% CI)                                            | <i>p</i> value |
| Model 1: Serum sphingomyelin                                                 | 1.14 (0.95, 1.35)                                        | 0.16           | 2.19 (0.42, 11.41)                                      | 0.4            |
| Model 2: Model 1 + sex + age of diabetes onset + diabetes duration + smoking | 1.21 (1.01, 1.46)                                        | 0.05           | 2.27 (0.45, 11.41)                                      | 0.3            |
| Model 3: Model 2 + systolic blood pressure                                   | 1.20 (0.99, 1.45)                                        | 0.06           | 2.28 (0.45, 11.47)                                      | 0.3            |
| Model 4: Model 3 + HDL-cholesterol                                           | 1.26 (1.04, 1.53)                                        | 0.02           | 2.20 (0.44, 11.05)                                      | 0.3            |
| Model 5: Model 4 + triglycerides                                             | 1.10 (0.91, 1.33)                                        | 0.3            | 1.15 (0.23, 5.91)                                       | 0.9            |
| Model 6: Model 5 + BMI                                                       | 1.10 (0.91, 1.33)                                        | 0.3            | 1.06 (0.20, 5.61)                                       | 0.9            |
| Model 7: Model 6 + HbA <sub>1c</sub>                                         | 0.97 (0.79, 1.19)                                        | 0.8            | 0.50 (0.09, 2.96)                                       | 0.4            |
| Model 8: Model 3 + BMI + HbA <sub>1c</sub>                                   | 1.01 (0.82, 1.24)                                        | 0.9            | 1.04 (0.74, 1.46)                                       | 0.8            |

\*Reported HR increase corresponds to a one standard deviation (SD) increase in sphingomyelin level.

Progression rate to microalbuminuria – 134 individuals out of 778 with baseline normoalbuminuria, resulting in a progression rate of 20.2 per 1,000 person-years. Progression rate to macroalbuminuria was 46 individuals out of 148 with baseline microalbuminuria, resulting in a progression rate 1.1 per 1,000 person-years.



ESM Table 6. Cox regression models for death and ischemic stroke risk factors in dependence on serum sphingomyelin level.

| Model | Variables included                                               | Death<br>(97/1087) |                   | Stroke<br>(60/1087) |                   |
|-------|------------------------------------------------------------------|--------------------|-------------------|---------------------|-------------------|
|       |                                                                  | HR* (95% CI)       | <i>p</i><br>value | HR* (95% CI)        | <i>p</i><br>value |
| 1     | Serum sphingomyelin                                              | 2.15 (0.82, 5.63)  | 0.1               | 1.10 (0.87, 1.39)   | 0.4               |
| 2     | 1 + gender + age of diabetes onset + diabetes duration + smoking | 1.14 (0.40, 3.23)  | 0.8               | 1.04 (0.81, 1.32)   | 0.8               |

\*Reported HR increase corresponds to a one standard deviation (SD) increase in sphingomyelin level. The incidence rate for stroke was 4.3 per 1,000 person-years (60 individuals experienced incident stroke from 1087 included) and mortality rate was 6.7 per 1,000 person-years (97 subjects died from 1087 included in the study).

ESM Fig. 1. ROC curve for serum sphingomyelin and serum sphingomyelin alone or on top of urinary albumin excretion rate (UAER) compared to UAER alone as a predictor of the fastest 25% eGFR decline.

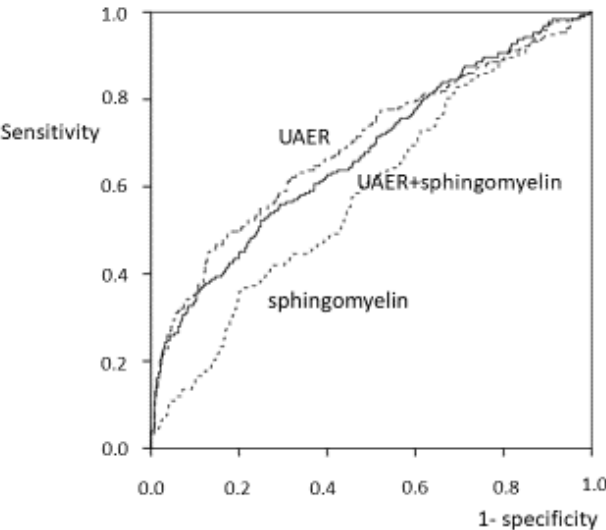

## Physicians and nurses at FinnDiane centers participating in patient recruitment and characterization.

### The Finnish Diabetic Nephropathy Study Centers

|                                                                                         |                                                                                                                                                                                                                     |
|-----------------------------------------------------------------------------------------|---------------------------------------------------------------------------------------------------------------------------------------------------------------------------------------------------------------------|
| Anjalankoski Health Center                                                              | S.Koivula, T.Uggeldahl                                                                                                                                                                                              |
| Central Finland Central Hospital, Jyväskylä                                             | T.Forslund, A.Halonen, A.Koistinen, P.Koskiahho,<br>M.Laukkanen, J.Saltevo, M.Tiihonen                                                                                                                              |
| Central Hospital of Åland Islands, Mariehamn                                            | M.Forsen, H.Granlund, A.-C.Jonsson, B.Nyroos                                                                                                                                                                        |
| Central Hospital of Kanta-Häme, Hämeenlinna                                             | P.Kinnunen, A.Orvola, T.Salonen, A.Vähänen                                                                                                                                                                          |
| Central Hospital of Kymenlaakso, Kotka                                                  | R.Paldanius, M.Riihelä, L.Ryysy                                                                                                                                                                                     |
| Central Hospital of Länsi-Pohja, Kemi                                                   | H.Laukkanen, P.Nyländen, A.Sademies                                                                                                                                                                                 |
| Central Ostrobothnian Hospital District, Kokkola                                        | S.Anderson, B.Asplund, U.Byskata, P.Liedes,<br>M.Kuusela, T.Virkkala                                                                                                                                                |
| City of Espoo Health Center:                                                            |                                                                                                                                                                                                                     |
| Espoonlahti                                                                             | A.Nikkola, E.Ritola                                                                                                                                                                                                 |
| Tapiola                                                                                 | M.Niska, H.Saarinen                                                                                                                                                                                                 |
| Samaria                                                                                 | E.Oukko-Ruponen, T.Virtanen                                                                                                                                                                                         |
| Viherlaakso                                                                             | A.Lyytinen                                                                                                                                                                                                          |
| City of Helsinki Health Center:                                                         |                                                                                                                                                                                                                     |
| Puistola                                                                                | H.Kari, T.Simonen                                                                                                                                                                                                   |
| Suutarila                                                                               | A.Kaprio, J.Kärkkäinen, B.Rantaeskola                                                                                                                                                                               |
| Töölö                                                                                   | P.Kääriäinen, J.Haaga, A-L.Pietiläinen                                                                                                                                                                              |
| City of Hyvinkää Health Center                                                          | S.Klemetti, T.Nyandoto, E.Rontu, S.Satuli-Autere                                                                                                                                                                    |
| City of Vantaa Health Center:                                                           |                                                                                                                                                                                                                     |
| Korso                                                                                   | R.Toivonen, H.Virtanen                                                                                                                                                                                              |
| Länsimäki                                                                               | R.Ahonen, M.Ivaska-Suomela, A.Jauhiainen                                                                                                                                                                            |
| Martinlaakso                                                                            | M.Laine, T.Pellonpää, R.Puranen                                                                                                                                                                                     |
| Myyrmäki                                                                                | A.Airas, J.Laakso, K.Rautavaara                                                                                                                                                                                     |
| Rekola                                                                                  | M.Erola, E.Jatkola                                                                                                                                                                                                  |
| Tikkurila                                                                               | R.Lönnblad, A.Malm, J.Mäkelä, E.Rautamo                                                                                                                                                                             |
| Heinola Health Center                                                                   | P.Hentunen, J.Lagerstam                                                                                                                                                                                             |
| Helsinki University Central Hospital, Department of<br>Medicine, Division of Nephrology | M.Feodoroff, D.Gordin, O.Heikkilä, K.Hietala, J.Fagerudd,<br>M.Korolainen, L.Kyllönen, J.Kytö, S.Lindh, K.Pettersson-Fernholm,<br>M.Rosengård-Bärlund, A.Sandelin, L.Thorn, J.Tuomikangas,<br>T.Vesisenaho, J.Wadén |

|                                                           |                                                                                                                                                                     |
|-----------------------------------------------------------|---------------------------------------------------------------------------------------------------------------------------------------------------------------------|
| Herttoniemi Hospital, Helsinki                            | V.Sipilä                                                                                                                                                            |
| Hospital of Lounais-Häme, Forssa                          | T.Kalliomäki, J.Koskelainen, R.Nikkanen,<br>N.Savolainen, H.Sulonen, E.Valtonen                                                                                     |
| Hyvinkää Hospital                                         | L. Norvio, A.Hämäläinen                                                                                                                                             |
| Iisalmi Hospital                                          | E.Toivanen                                                                                                                                                          |
| Jokilaakso Hospital, Jämsä                                | A.Parta, I.Pirttiniemi                                                                                                                                              |
| Jorvi Hospital, Helsinki University Central Hospital      | S.Aranko, S.Ervasti, R.Kauppinen-Mäkelin,<br>A.Kuusisto, T.Leppälä, K.Nikkilä, L.Pekkonen                                                                           |
| Jyväskylä Health Center, Kyllö                            | K.Nuorva, M.Tiihonen                                                                                                                                                |
| Kainuu Central Hospital, Kajaani<br>M.Mankinen, A.Reponen | S.Jokelainen, K.Kananen, M.Karjalainen, P.Kemppainen, A-<br>M.Sankari                                                                                               |
| Kerava Health Center                                      | H.Stuckey, P.Suominen                                                                                                                                               |
| Kirkkonummi Health Center                                 | A.Lappalainen, M.Liimatainen, J.Santaholma                                                                                                                          |
| Kivelä Hospital, Helsinki                                 | A.Aimolahti, E.Huovinen                                                                                                                                             |
| Koskela Hospital, Helsinki                                | V.Ilkka, M.Lehtimäki                                                                                                                                                |
| Kotka Health Center                                       | E.Pälikkö-Kontinen, A.Vanhanen                                                                                                                                      |
| Kouvola Health Center                                     | E.Koskinen, T.Siitonen                                                                                                                                              |
| Kuopio University Hospital                                | E.Huttunen, R.Ikäheimo, P.Karhapää, P.Kekäläinen,<br>M.Laakso, T.Lakka, E.Lampainen, L.Moilanen, S. Tanskanen<br>L.Niskanen, U.Tuovinen, I.Vauhkonen, E.Voutilainen |
| Kuusamo Health Center                                     | T.Kääriäinen, E.Isopoussu                                                                                                                                           |
| Kuusankoski Hospital                                      | E.Kilkki, I.Koskinen, L.Riihelä                                                                                                                                     |
| Laakso Hospital, Helsinki                                 | T.Meriläinen, P.Poukka, R.Savolainen, N.Uhlenius                                                                                                                    |
| Lahti City Hospital                                       | A.Mäkelä, M.Tanner                                                                                                                                                  |
| Lapland Central Hospital, Rovaniemi<br>T.Tulokas          | L.Hyvärinen, K.Lampela, S.Pöykkö, T.Rompasaari, S.Severinkangas,                                                                                                    |
| Lappeenranta Health Center                                | P. Erola, L.Härkönen, P.Linkola, T.Pekkanen, I.Pulli, E.Repo                                                                                                        |
| Lohja Hospital<br>M.Tiikkainen,                           | T.Granlund, K.Hietanen, M.Porrassalmi, M.Saari, T.Salonen,                                                                                                          |
| Länsi-Uusimaa Hospital, Tammisaari                        | I.-M.Jousmaa, J.Rinne                                                                                                                                               |
| Loimaa Health Center                                      | A.Mäkelä, P.Eloranta                                                                                                                                                |
| Malmi Hospital, Helsinki                                  | H.Lanki, S.Moilanen, M.Tilly-Kiesi                                                                                                                                  |
| Mikkeli Central Hospital                                  | A.Gynther, R.Manninen, P.Nironen, M.Salminen,<br>T.Vänttinen                                                                                                        |
| Mänttä Regional Hospital                                  | I.Pirttiniemi, A-M.Hänninen                                                                                                                                         |

|                                                 |                                                                                                                                                |
|-------------------------------------------------|------------------------------------------------------------------------------------------------------------------------------------------------|
| North Karelian Hospital, Joensuu                | U-M.Henttula, P.Kekäläinen, M.Pietarinen,<br>A.Rissanen, M.Voutilainen                                                                         |
| Nurmijärvi Health Center                        | A.Burgos, K.Urtamo                                                                                                                             |
| Oulaskangas Hospital, Oulainen                  | E.Jokelainen, P-L.Jylkkä, E.Kaarlela, J.Vuolaspuro                                                                                             |
| Oulu Health Center                              | L.Hiltunen, R.Häkkinen, S.Keinänen-Kiukaanniemi                                                                                                |
| Oulu University Hospital                        | R.Ikäheimo                                                                                                                                     |
| Päijät-Häme Central Hospital                    | H.Haapamäki, A.Helanterä, S.Hämäläinen,<br>V.Ilvesmäki, H.Miettinen                                                                            |
| Palokka Health Center                           | P.Sopanen, L.Welling                                                                                                                           |
| Pieksämäki Hospital                             | V.Sevtsenko, M.Tamminen                                                                                                                        |
| Pietarsaari Hospital                            | M-L.Holmbäck, B.Isomaa, L.Sarelin                                                                                                              |
| Pori City Hospital                              | P.Ahonen, P.Merisalo, E.Muurinen, K.Sävelä                                                                                                     |
| Porvoo Hospital                                 | M.Kallio, B.Rask, S.Rämö                                                                                                                       |
| Raahe Hospital                                  | A.Holma, M.Honkala, A.Tuomivaara, R.Vainionpää                                                                                                 |
| Rauma Hospital                                  | K.Laine, K.Saarinen, T.Salminen                                                                                                                |
| Riihimäki Hospital                              | P.Aalto, E.Immonen, L.Juurinen                                                                                                                 |
| Salo Hospital                                   | A.Alanko, J.Lapinleimu, P.Rautio, M.Virtanen                                                                                                   |
| Satakunta Central Hospital, Pori                | M.Asola, M.Juhola, P.Kunelius, M.-L.Lahdenmäki,<br>P.Pääkkönen, M.Rautavirta                                                                   |
| Savonlinna Central Hospital                     | T.Pulli, P.Sallinen, M.Taskinen, E.Tolvanen, T.Tuominen<br>H.Valtonen, A.Vartia, S-L.Viitanen                                                  |
| Seinäjoki Central Hospital                      | O.Antila, E.Korpi-Hyövälti, T.Latvala, E.Leijala, T.Leikkari, M.Punkari<br>N.Rantamäki, H.Vähävuori                                            |
| South Karelia Central Hospital, Lappeenranta    | T.Ensala, E.Hussi, R.Härkönen, U.Nyholm, J.Toivanen                                                                                            |
| Tampere Health Center                           | A.Vaden, P.Alarotu, E.Kujansuu, H.Kirkkopelto-Jokinen,<br>M.Helin, S.Gummerus, L.Calonius, T.Niskanen, T.Kaitala,<br>T.Vatanen                 |
| Tampere University Hospital<br>M.Määttä,        | P. Hannula, I.Ala-Houhala, R.Kannisto, T.Kuningas, P.Lampinen,<br>H.Oksala, T.Oksanen, A.Putila, H.Saha, K.Salonen, H.Tauriainen,<br>S.Tulokas |
| Tiirismaa Health Center, Hollola                | T.Kivelä, L.Petlin, L.Savolainen                                                                                                               |
| Turku Health Center<br>M.Viinikkala, M.Vähätalo | A.Artukka, I.Hämäläinen, L.Lehtinen, E.Pyysalo, H.Virtamo,                                                                                     |
| Turku University Central Hospital               | K.Breitholz, R.Eskola, K.Metsärinne, U.Pietilä,<br>P.Saarinen, R.Tuominen, S.Äyräpää                                                           |

Vaajakoski Health Center

K.Mäkinen, P.Sopanen

Valkeakoski Regional Hospital

S.Ojanen, E.Valtonen, H.Ylönen, M.Rautiainen,

T.Immonen

Vammala Regional Hospital

I.Isomäki, R.Kroneld, L.Mustaniemi, M.Tapiolinna-Mäkelä

Vasa Central Hospital

S.Bergkulla, U.Hautamäki, V-A.Myllyniemi, I.Rusk
